# Supplementary material for: Free-Standing, Interwoven Tubular Graphene Mesh-Supported Binary AuPt Nanocatalysts: An Innovative and High-Performance Anode Methanol Oxidation Catalyst
Source: MDPI journal article supplement (doi:10.3390/nano12101689), 2022-05-16
Supplement: s1 [file s1]

Supplementary Materials

# Free-Standing, Interwoven Tubular Graphene Mesh-Supported Binary AuPt Nanocatalysts: An Innovative and High-Performance Anode Methanol Oxidation Catalyst

An T. Nguyen <sup>1,†</sup>, Van Viet Tran <sup>1,†</sup>, Asnidar Siahaan <sup>1</sup>, Hung-Chih Kan <sup>1</sup>, Yung-Jung Hsu <sup>2</sup>, Chia-Chen Hsu <sup>1,\*</sup>

<sup>1</sup> Department of Physics, National Chung Cheng University, Chiayi 621, Taiwan; anhydrit210@gmail.com (A.T.N.); viettran.apc@gmail.com (V.V.T.); asnidarsiahaan2014@gmail.com (A.S.); phyhck@ccu.edu.tw (H.-C.K.)

<sup>2</sup> Department of Materials Science and Engineering, National Chiao Tung Yang Ming University, Hsinchu 30010, Taiwan; yhsu@cc.nctu.edu.tw

\* Correspondence: phycch@ccu.edu.tw; Tel.: +886-5-2720411 (ext. 66305)

† These authors contributed equally to this work.

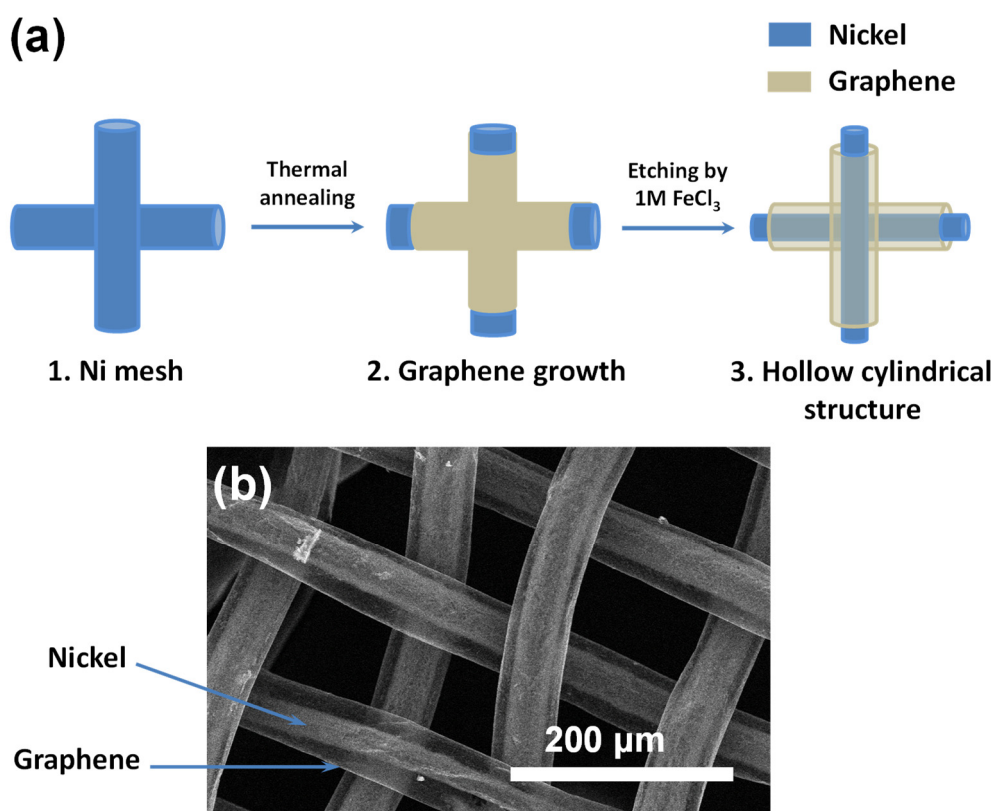

**Figure S1.** (a) The illustration for the preparation of hollow cylindrical structures, (b) SEM image of a typical hollow cylindrical structure of graphene-covered Ni mesh.

**Table S1.** ICP-MS results of TG/Au<sub>x</sub> catalysts. V<sub>Au</sub>: the adding volume of HAuCl<sub>4</sub> precursor solution.

| Catalyst               | V <sub>Au</sub> (μl) | m <sub>Au</sub> (mg) |
|------------------------|----------------------|----------------------|
| TG/Au <sub>0.171</sub> | 60                   | 0.171                |
| TG/Au <sub>0.258</sub> | 90                   | 0.258                |
| TG/Au <sub>0.346</sub> | 120                  | 0.346                |
| TG/Au <sub>0.554</sub> | 180                  | 0.554                |

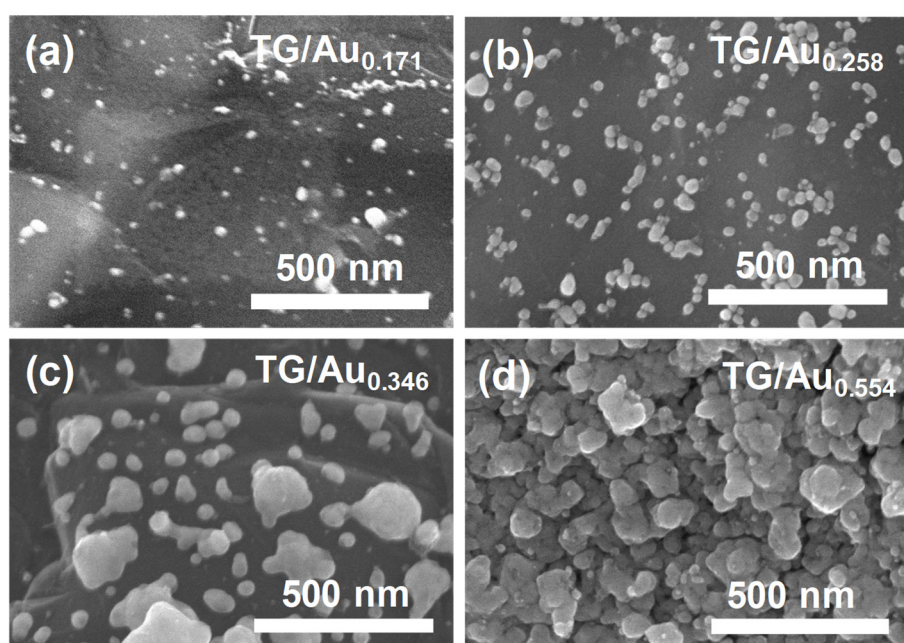**Figure S2.** FE-SEM images of TG/Au<sub>x</sub> with different mass loadings of Au NPs.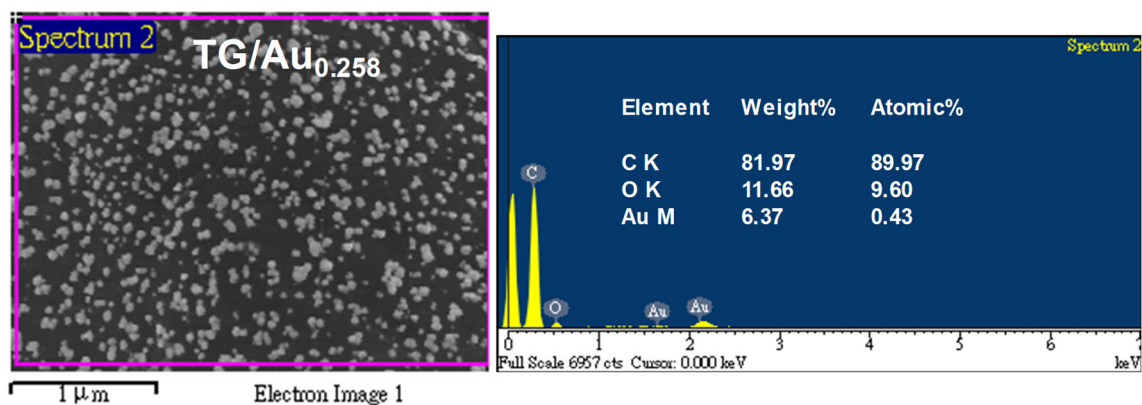**Figure S3.** EDS result of the TG/Au<sub>0.258</sub> catalyst.

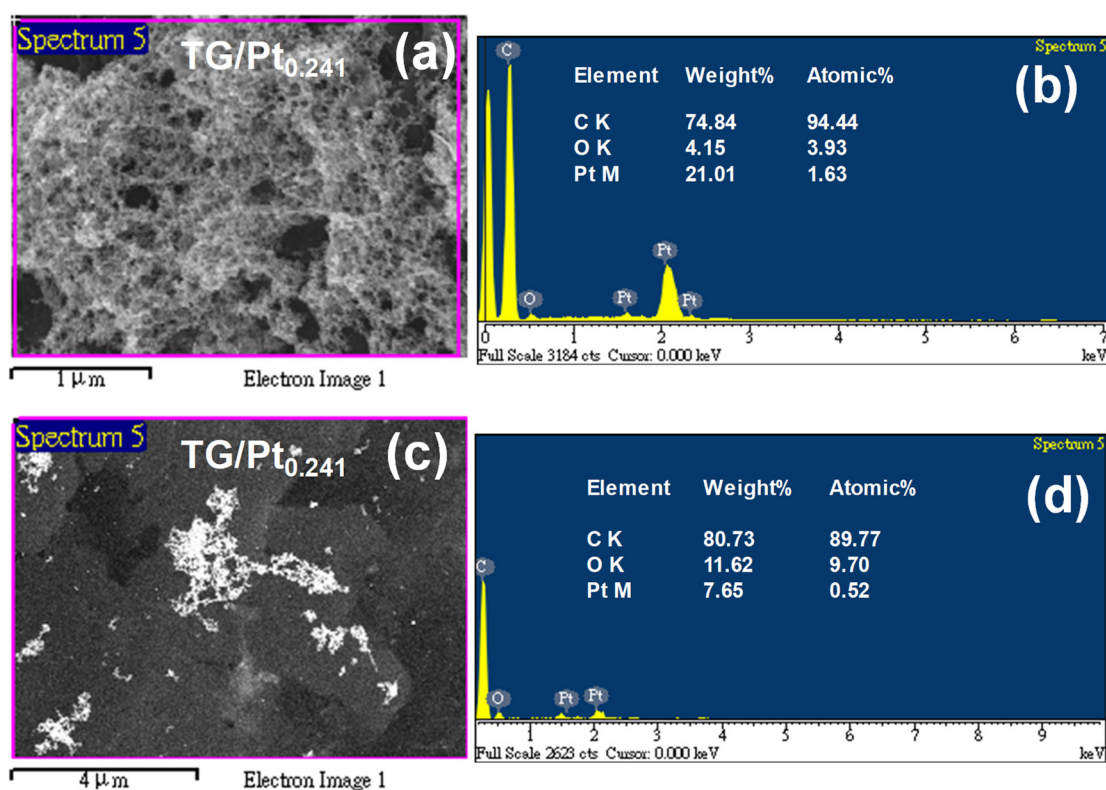

Figure S4. EDS analyses for the TG/Pt<sub>0.241</sub> catalyst obtained by scanning on the high coverage (a,b) and low coverage (c, d) of Pt NPs areas.

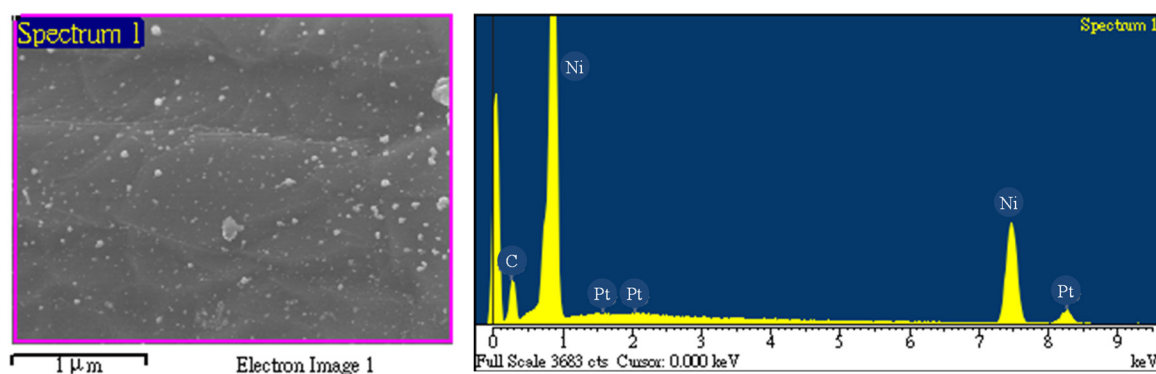

Figure S5. EDS analysis of the TG/Pt<sub>0.241</sub> before removing Ni. Oxygen was not found in the sample.

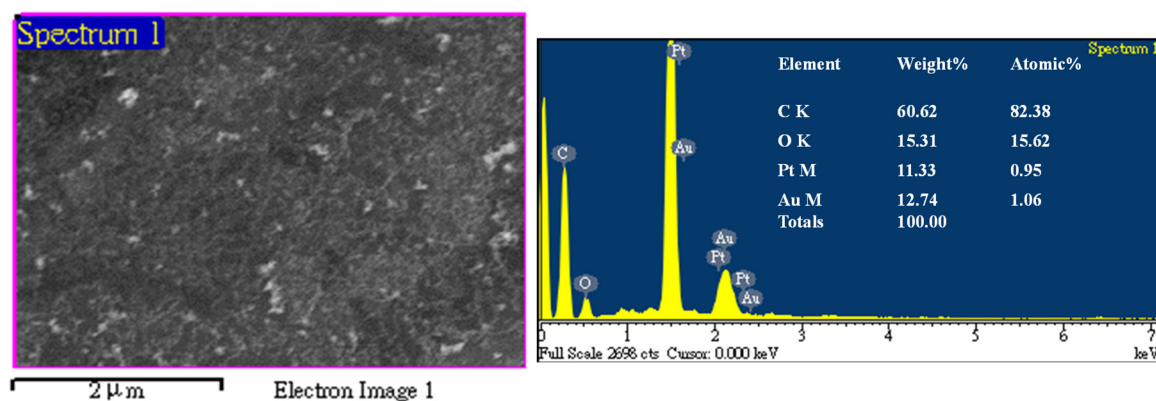

Figure S6. EDS analysis for the TG/Au<sub>52</sub>Pt<sub>48</sub> catalyst. Right panel shows the elemental distribution of C, O, Au, and Pt.

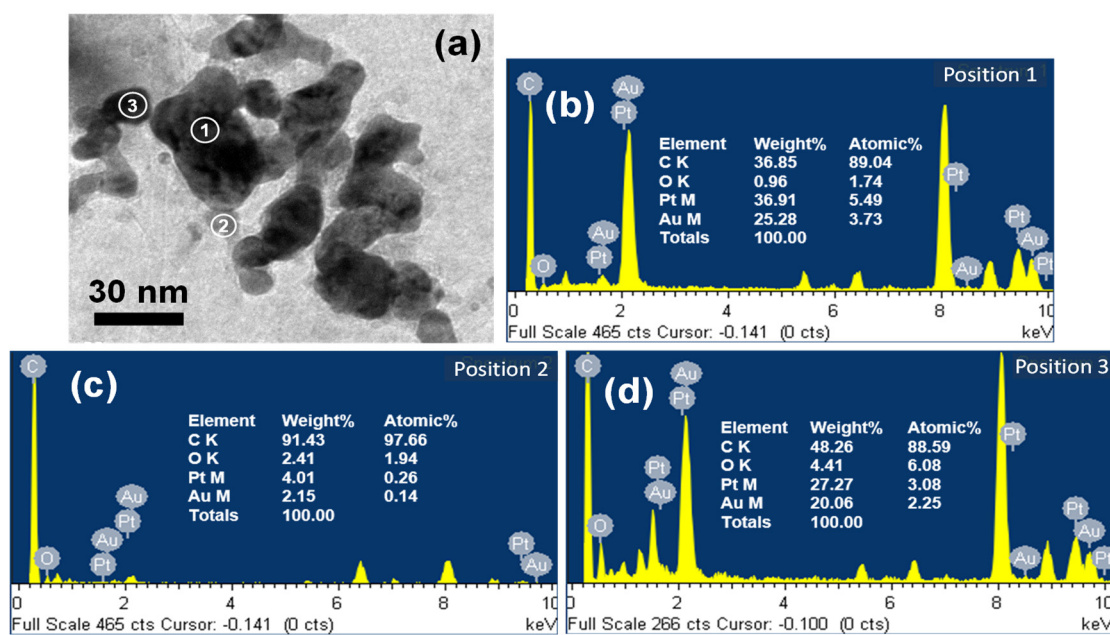

Figure S7. (a-d) TEM-EDS analyses for the TG/Au<sub>52</sub>Pt<sub>48</sub> catalyst at three different nano-areas.

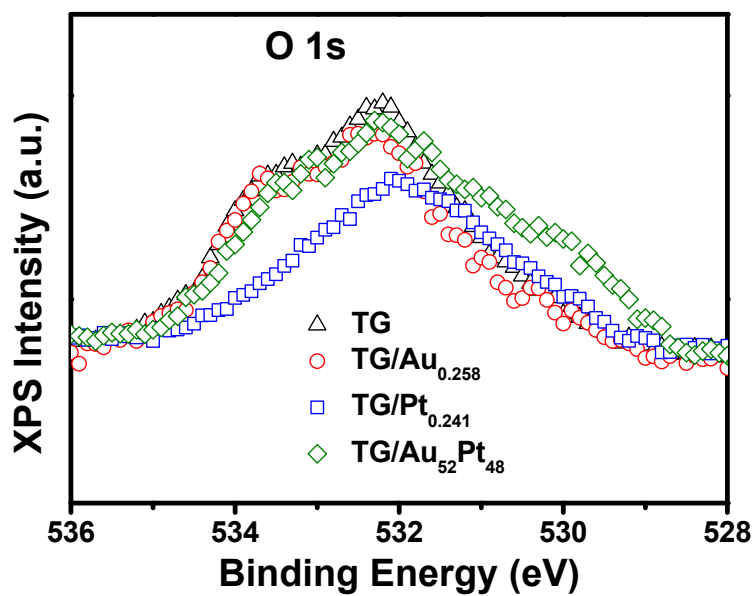

Figure S8. XPS O 1s scans of the TG-based catalysts.

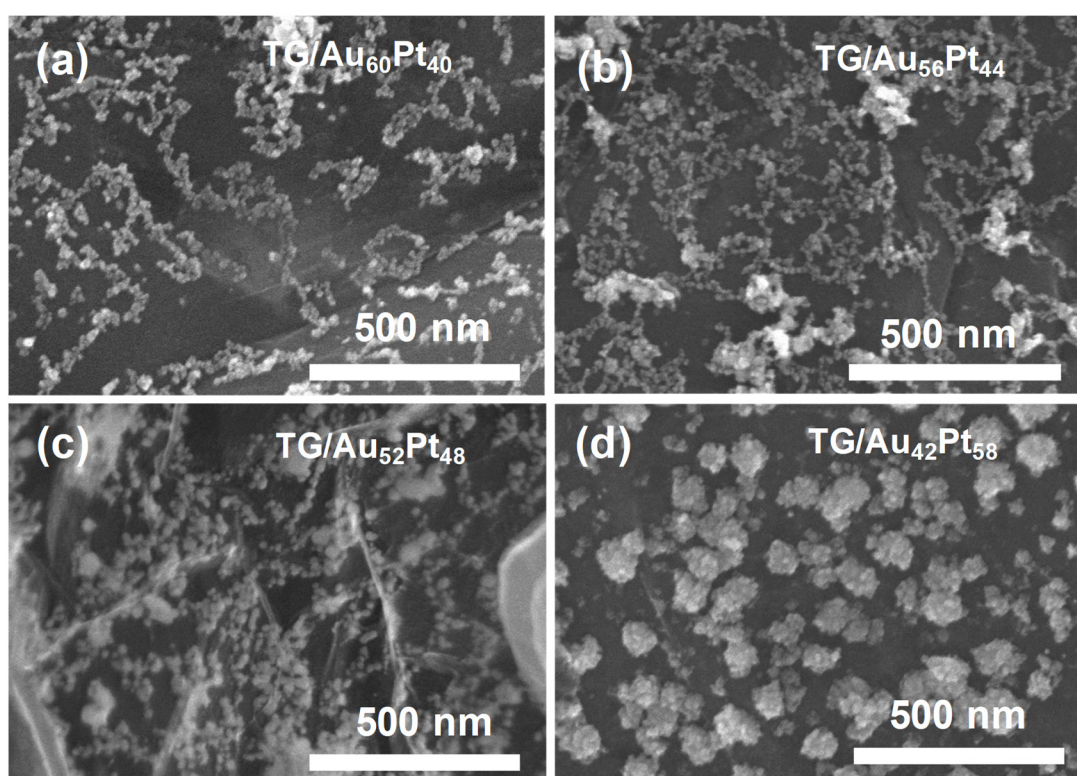

**Figure S9.** SEM images of TG/Au<sub>x</sub>Pt<sub>y</sub> catalysts obtained with different concentrations of Pt precursor.

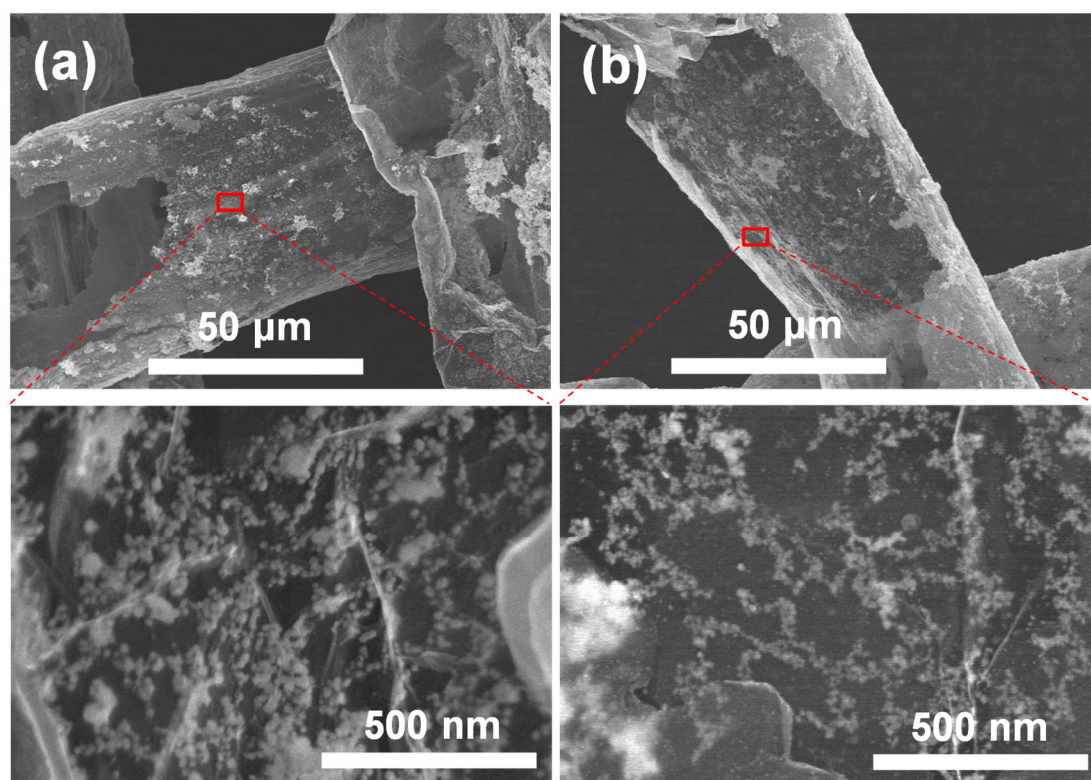

**Figure S10.** SEM images at low (upper panels) and high magnification (bottom panels) of the TG'/Au<sub>53</sub>Pt<sub>47</sub>: The distribution of binary AuPt NPs on the outer wall (a) and the inner wall (b) of a graphene tube.

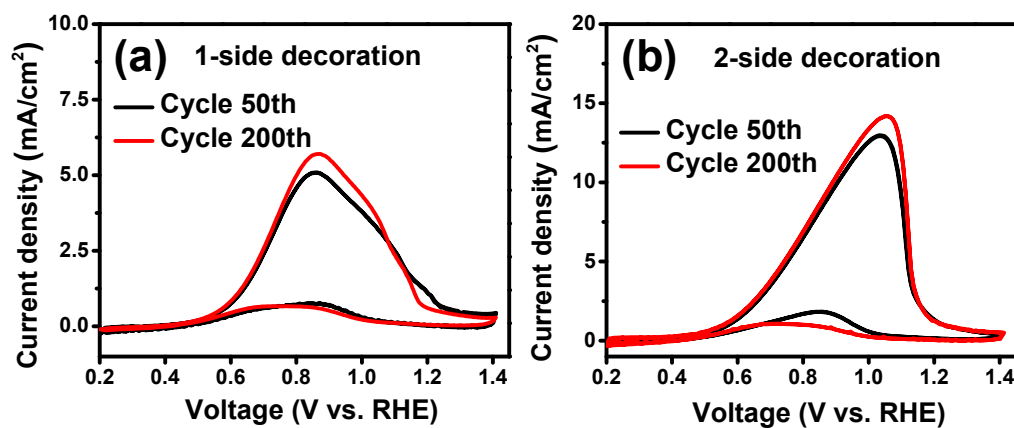

**Figure S11.** CVs of methanol oxidation at the cycle number of 50 and 200 recorded in 0.5M KOH + 1M CH<sub>3</sub>OH solution of the TG/Au<sub>52</sub>Pt<sub>48</sub> (a) and TG'/Au<sub>53</sub>Pt<sub>47</sub> (b) catalysts.
